# Supplementary material
Source: publisher site journal article supplement (https://www.dovepress.com/article/312731)
Supplement: Supplementary file 1 [file get_supplementary_file.php]

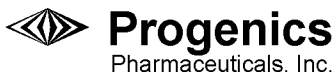

MNTX 302

## Confidential Phase 3 Clinical Study Report

## 16.1.3.1 List of IRBs/IECs

| Site | IRB or IEC name and address                                                                                                                                                                                                                |
|------|--------------------------------------------------------------------------------------------------------------------------------------------------------------------------------------------------------------------------------------------|
| 02   | Schulman Associates Institutional Review Board<br>4290 Glendale-Milford Rd<br>Cincinnati, OH 45242<br>Chair: Sharon Lynn Nelson, M.S.N., R.N., C.N.S.                                                                                      |
| 03   | Schulman Associates Institutional Review Board<br>4290 Glendale-Milford Rd<br>Cincinnati, OH 45242<br>Chair: Sharon Lynn Nelson, M.S.N., R.N., C.N.S.                                                                                      |
| 04   | Schulman Associates Institutional Review Board<br>4290 Glendale-Milford Rd<br>Cincinnati, OH 45242<br>Chair: Sharon Lynn Nelson, M.S.N., R.N., C.N.S.                                                                                      |
| 05   | Research Ethics Boards<br>McGill University Health Centre<br>1650 Cedar<br>Montreal (Quebec) Canada H3G 1A4<br>Chair: Committee A - Celeste Johnston, DEd, (Co-Chair), Lawrence Hutchison, MD, (Co-Chair) Committee B - Serge Gauthier, MD |
| 06   | Schulman Associates Institutional Review Board<br>4290 Glendale-Milford Rd<br>Cincinnati, OH 45242<br>Chair: Sharon Lynn Nelson, M.S.N., R.N., C.N.S.                                                                                      |
| 08   | Schulman Associates Institutional Review Board<br>4290 Glendale-Milford Rd<br>Cincinnati, OH 45242<br>Chair: Sharon Lynn Nelson, M.S.N., R.N., C.N.S.                                                                                      |
| 10   | University of British Columbia<br>British Columbia Cancer Agency Research Ethics Board<br>Vancouver Centre – Room 4571 Alcove<br>600 West 10 <sup>th</sup> Avenue<br>Vancouver, BC V5Z 4E6<br>Chair: Dr. Joseph Connors                    |
| 11   | San Diego Hospice IRB<br>4311 Third Avenue<br>San Diego, CA 92103<br>Chair: Linda Strause, PhD                                                                                                                                             |
| 12   | University of Utah Institutional Review Board<br>20 North 1900 East 101 NREB<br>Salt Lake City, UT 84132<br>Chair: John Hurdle, M.D., PhD                                                                                                  |
| 14   | Henry Ford Health System<br>Institutional Review Board<br>CFP-Basement 046<br>2799 West Grand Blvd<br>Detroit, MI 48202-2689<br>Chair: Timothy Roehrs, PhD                                                                                 |

# Confidential Phase 3 Clinical Study Report

## 16.1.3.1 List of IRBs/IECs - continued

| Site | IRB or IEC name and address                                                                                                                                                       |
|------|-----------------------------------------------------------------------------------------------------------------------------------------------------------------------------------|
| 16   | Schulman Associates Institutional Review Board<br>4290 Glendale-Milford Rd<br>Cincinnati, OH 45242<br>Chair: Sharon Lynn Nelson, M.S.N., R.N., C.N.S.                             |
| 17   | Schulman Associates Institutional Review Board<br>4290 Glendale-Milford Rd<br>Cincinnati, OH 45242<br>Chair: Sharon Lynn Nelson, M.S.N., R.N., C.N.S.                             |
| 18   | Human Subjects Protection Office<br>The Penn State University/ The Milton S Hershey Medical Center<br>500 University Drive – PO Box 850<br>Hershey, PA 17033<br>Chair: Not Listed |
| 19   | City of Hope IRB<br>1500 E Duarte Rd<br>Duarte, CA 91010<br>Chair: Not Listed                                                                                                     |
| 24   | Schulman Associates Institutional Review Board<br>4290 Glendale-Milford Rd<br>Cincinnati, OH 45242<br>Chair: Sharon Lynn Nelson, M.S.N., R.N., C.N.S.                             |
| 25   | Schulman Associates Institutional Review Board<br>4290 Glendale-Milford Rd<br>Cincinnati, OH 45242<br>Chair: Sharon Lynn Nelson, M.S.N., R.N., C.N.S.                             |
| 26   | Schulman Associates Institutional Review Board<br>4290 Glendale-Milford Rd<br>Cincinnati, OH 45242<br>Chair: Sharon Lynn Nelson, M.S.N., R.N., C.N.S.                             |
| 27   | Schulman Associates Institutional Review Board<br>4290 Glendale-Milford Rd<br>Cincinnati, OH 45242<br>Chair: Sharon Lynn Nelson, M.S.N., R.N., C.N.S.                             |
| 28   | Schulman Associates Institutional Review Board<br>4290 Glendale-Milford Rd<br>Cincinnati, OH 45242<br>Chair: Sharon Lynn Nelson, M.S.N., R.N., C.N.S.                             |
| 29   | Schulman Associates Institutional Review Board<br>4290 Glendale-Milford Rd<br>Cincinnati, OH 45242<br>Chair: Sharon Lynn Nelson, M.S.N., R.N., C.N.S.                             |
| 30   | Schulman Associates Institutional Review Board<br>4290 Glendale-Milford Rd<br>Cincinnati, OH 45242<br>Chair: Sharon Lynn Nelson, M.S.N., R.N., C.N.S.                             |

# Confidential Phase 3 Clinical Study Report

## 16.1.3.1 List of IRBs/IECs -continued

| Site | IRB or IEC name and address                                                                                                                           |
|------|-------------------------------------------------------------------------------------------------------------------------------------------------------|
| 33   | Schulman Associates Institutional Review Board<br>4290 Glendale-Milford Rd<br>Cincinnati, OH 45242<br>Chair: Sharon Lynn Nelson, M.S.N., R.N., C.N.S. |
| 34   | Schulman Associates Institutional Review Board<br>4290 Glendale-Milford Rd<br>Cincinnati, OH 45242<br>Chair: Sharon Lynn Nelson, M.S.N., R.N., C.N.S. |
| 36   | Schulman Associates Institutional Review Board<br>4290 Glendale-Milford Rd<br>Cincinnati, OH 45242<br>Chair: Sharon Lynn Nelson, M.S.N., R.N., C.N.S. |
| 37   | Schulman Associates Institutional Review Board<br>4290 Glendale-Milford Rd<br>Cincinnati, OH 45242<br>Chair: Sharon Lynn Nelson, M.S.N., R.N., C.N.S. |
| 38   | Schulman Associates Institutional Review Board<br>4290 Glendale-Milford Rd<br>Cincinnati, OH 45242<br>Chair: Sharon Lynn Nelson, M.S.N., R.N., C.N.S. |
| 39   | Schulman Associates Institutional Review Board<br>4290 Glendale-Milford Rd<br>Cincinnati, OH 45242<br>Chair: Sharon Lynn Nelson, M.S.N., R.N., C.N.S. |
| 40   | Schulman Associates Institutional Review Board<br>4290 Glendale-Milford Rd<br>Cincinnati, OH 45242<br>Chair: Sharon Lynn Nelson, M.S.N., R.N., C.N.S. |
| 41   | Schulman Associates Institutional Review Board<br>4290 Glendale-Milford Rd<br>Cincinnati, OH 45242<br>Chair: Sharon Lynn Nelson, M.S.N., R.N., C.N.S. |

**16.1.3 List of Independent Ethics Committees (IECs)/Institutional Review Boards (IRBs) and Sample Consent Forms**

Recruiting Sites and Corresponding IRBs - January 2013  
Subject Consent May 23, 2011 Protocol Amendment #3  
Subject Consent July 12, 2011 Protocol Amendment #4  
Caregiver Consent May 23, 2011 Protocol Amendment #3  
Caregiver Consent - July 12, 2011 Protocol Amendment #4

**Protocols 3200K1-4000-WW (B2541005) & 3200K1-4001-WW (B2541006)**

**List of Investigators Sites and their Corresponding IRBs**

| <b>Site No.</b> | <b>Site Address</b>                                                                                                                                                                            | <b>Address for IRB</b>                                                                                                   |
|-----------------|------------------------------------------------------------------------------------------------------------------------------------------------------------------------------------------------|--------------------------------------------------------------------------------------------------------------------------|
| 002             | Richard Levene<br>Hospice of Palm Beach County<br>5300 East Avenue West Palm Beach,<br>FL 33407, USA                                                                                           | Schulman Associates IRB<br>4290 Glendale Milford Road •<br>Cincinnati, Ohio 45242                                        |
| 004             | Chuck Wellman<br>Hospice of the Western Reserve<br>300 E.185th St Cleveland, OH 44119, USA                                                                                                     | Schulman Associates IRB<br>4290 Glendale Milford Road •<br>Cincinnati, Ohio 45242                                        |
| 006             | Kumarasamy Sivakumar,<br>Research Center for Clinical Studies-West, nc.<br>1314 West Avenue J Lancaster, CA 93534, USA                                                                         | Schulman Associates IRB<br>4290 Glendale Milford Road •<br>Cincinnati, Ohio 45242                                        |
| 011             | Jared Winston<br>Senior Adult Specialty Research<br>3215 Steck Avenue Suite 202 Austin,<br>TX 78757, USA                                                                                       | Schulman Associates IRB<br>4290 Glendale Milford Road •<br>Cincinnati, Ohio 45242                                        |
| 012             | Richard Stephenson<br>Hospice & Palliative Care Center<br>101 Hospice Lane Winston Salem, NC 27103, USA                                                                                        | Schulman Associates IRB<br>4290 Glendale Milford Road •<br>Cincinnati, Ohio 45242                                        |
| 013             | Donna Zhukovsky<br>M.D. Anderson Cancer Center<br>Investigator Pharmacy Services<br>1515 Holcombe Blvd, Room B 1.4392 Houston,<br>Texas 77030, USA                                             | The University of Texas,<br>MD Anderson Cancer Centre<br>Institutional Review Board,<br>Unit 1437,                       |
| 014             | David McGrew<br>Hernando Pasco Hospice, Inc.<br>12107 Majestic Blvd Hudson, FL 34667, USA                                                                                                      | Schulman Associates IRB<br>4290 Glendale Milford Road •<br>Cincinnati, Ohio 45242                                        |
| 016             | Sloan Beth Karver<br>H. Lee Moffitt Cancer and Research Institute<br>Investigational Drug Services Pharmacy<br>Department, Moffitt Cancer Center 12902 Magnolia<br>Drive, Tampa, FL 33612, USA | Division of Research Integrity & Compliance<br>12901 Bruce B, Downs Blvd, MDC35<br>Tampa FL 33612-4799                   |
| 018             | Marcin Chwistek<br>Fox Chase Cancer Center<br>333 Cottman Ave Philadelphia, PA 19111, USA                                                                                                      | Fox Chase Cancer Centre<br>Institutional Review Board, 50 Huntingdon Pike,<br>Rockledge, PA 19046                        |
| 020             | Janet Bull<br>Four Seasons Hospice and Palliative Care<br>571 S Allen Rd Flat Rock, NC 28731, USA                                                                                              | Schulman Associates IRB<br>4290 Glendale Milford Road •<br>Cincinnati, Ohio 45242                                        |
| 026             | Maria Jakobsson<br>Palliative Unit Vrinnevi Hospital<br>Apoteket Vrinnevisjukhuset EA Att: Eva Malmberg<br>Gamlavagen 25 601 82 Norrka ping Sweden                                             | Regionala Etikprövningsnämnden i Linköping<br>c/o Hälsouniversitetets kansli<br>Sandbäcksgatan 7<br>581 83 Linköping ZIL |
| 027             | Gunnar Eckerdale<br>ASIH Kungsbacka Narsjukhus<br>Varbergs sjukhusapotek Att: Ulla Brattgayrd<br>Traslavsvagen 68 432 81 Varberg Sweden                                                        | Regionala Etikprövningsnämnden i Linköping<br>c/o Hälsouniversitetets kansli<br>Sandbäcksgatan 7<br>581 83 Linköping ZIL |

**Protocols 3200K1-4000-WW (B2541005) & 3200K1-4001-WW (B2541006)**

**List of Investigators Sites and their Corresponding IRBs**

| <b>Site No.</b> | <b>Site Address</b>                                                                                                                                                                                  | <b>Address for IRB</b>                                                                                                                                                                      |
|-----------------|------------------------------------------------------------------------------------------------------------------------------------------------------------------------------------------------------|---------------------------------------------------------------------------------------------------------------------------------------------------------------------------------------------|
| 028             | Jose Gamez<br>Galiz Research, LLC<br>201 Curtis Parkway Suite 304 Miami Springs,<br>FL 33166, USA                                                                                                    | Schulman Associates IRB<br>4290 Glendale Milford Road •<br>Cincinnati, Ohio 45242                                                                                                           |
| 033             | Ana Casas<br>Hospital Virgen del Rocio<br>Edificio Hospital General Servicio de Farmacia<br>Unidad de Ensayos Clinicos Avda. Manuel Siurot<br>s/n planta semisotano Sevilla 041013 Spain             | Ethics Committee CEIC. CSUB Ciutat Sanitaria<br>Universitaria Bellvitge<br>Dirección: Feixa Llarga, s/n - Edifici de Suport a la<br>Recerca Localidad: Hospitalet de Llobregat<br>CP: 08907 |
| 034             | Pere Gascon<br>Hospital Clinic i Provincial<br>Agencia Ensayos Clinicos escalera 6B, sotano C/<br>Villarroel 170 08036 Barcelona Spain                                                               | Ethics Committee CEIC. CSUB Ciutat Sanitaria<br>Universitaria Bellvitge<br>Dirección: Feixa Llarga, s/n - Edifici de Suport a la<br>Recerca Localidad: Hospitalet de Llobregat<br>CP: 08907 |
| 036             | Jose Espinosa<br>Institut Catala d Oncologia<br>Ser. Farmacia ICO 2nd Ptn. At. Marta Vat/Rosa<br>Gomez av. Gran via s/n Km. 2,7 08907-Hospitalet<br>del Llobregat SPAIN                              | Ethics Committee CEIC. CSUB Ciutat Sanitaria<br>Universitaria Bellvitge<br>Dirección: Feixa Llarga, s/n - Edifici de Suport a la<br>Recerca Localidad: Hospitalet de Llobregat<br>CP: 08907 |
| 040             | Walter Cosolo<br>John Fawkner Private Hospital<br>HPS Pharmacies Brunswick 82 Moreland Road<br>Brunswick, Vic 3086 Australia Vacluse Hospital 82<br>Moreland Road Brunswick Victoria 3056 Australia  | Bellberry Limited<br>229 Greenhill Road, Dulwich,<br>South Australia 5065                                                                                                                   |
| 042             | Presidio Ospedaliero "San Salvatore"<br>Ospedale Civile San Salvatore Unita Operativa<br>Complessa del farmaco Farmacia Ospedaliera<br>Viale San Salvatore Coppito (l'Aquila)/ Italia, 6100<br>ITALY | Azienda Sanitaria Locale di Asti - ASL AT Sede<br>Legale Via Conte Verde, 125 - 14100 ASTI Casella<br>Postale 130 Centralino                                                                |
| 043             | Furlo Zucco<br>Azienda Ospedaliera G. Salvini<br>Unita' di Cure Palliative e Terapia del Dolore Viale<br>Forlanini 121 Garbagnate Milanese Milano Italy<br>20020                                     | COMITATO ETICO DELL'AZIENDA OSPEDALIERA<br>GUIDO SALVINI DI GARBAGNATE MILANESE (MI)<br>Viale Forlanini, 121<br>20024 GARBAGNATE MILANESE (MI)                                              |
| 044             | Augusto Tommaso Caraceni<br>Istituto Nazionale Tumori<br>Fondaz. IRCCS 1st. Nazionale Tumori S. C.<br>Farmacia Via Venezian, 1 Milano Italy 20133                                                    | COMITATO ETICO INDIPENDENTE DELLA<br>FONDAZIONE IRCCS ISTITUTO NAZIONALE DEI<br>TUMORI DI MILANO<br>Via Giacomo Venezian, 1<br>20133 - MILANO                                               |
| 046             | Richard Chye<br>St Vincent's Hospital<br>Linda Hotong Clinical Trials Pharmacist Pharmacy<br>Store Victoria Street Level 2 Xavier Building<br>Darlinghurst Australia NSW2010                         | St Vincent's Hospital Human Research Ethics<br>Committee (HREC)<br>"Research Office Level 6, de Lacy Building<br>St Vincent's Hospital, 390 Victoria St<br>Darlinghurst NSW 2010"           |

**Protocols 3200K1-4000-WW (B2541005) & 3200K1-4001-WW (B2541006)**

**List of Investigators Sites and their Corresponding IRBs**

| <b>Site No.</b> | <b>Site Address</b>                                                                                                                                                            | <b>Address for IRB</b>                                                                                                                                                                                |
|-----------------|--------------------------------------------------------------------------------------------------------------------------------------------------------------------------------|-------------------------------------------------------------------------------------------------------------------------------------------------------------------------------------------------------|
| 050             | Frank Elsner<br>University of Aachen<br>Med. Fakultät der RWTH Aachen Klinik fuer<br>Palliativmedizin Pauwelsstr. 30 Aachen 52074<br>Germany                                   | Ethik-Kommission an der Medizinischen Fakultät<br>Technischen Hochschule Aachen, Pauwelsstrasse<br>30, 52074 Aachen                                                                                   |
| 051             | Thomas Jehser<br>Gemeinschaftskrankenhaus Havelhoehe<br>Zentrum fuer Schmerz- und Palliativmedizin<br>Kladower Damm 221 Station 11 Berlin 14089<br>Germany                     | der Rheinisch-Westfalischen<br>Muenchen<br>Pettenkoferstrasse 8a 80336 Muenchen                                                                                                                       |
| 054             | Odette Spruyt<br>Peter MacCallum Cancer Institute<br>Pharmacy Department Peter MacCallum Cancer<br>Centre St Andrew's Place East Melbourne Victoria<br>3002 Australia          | Peter MacCallum Cancer Institute<br>Locked bag 1 A'Beckett Street, Victoria, 8006                                                                                                                     |
| 055             | Bernard J Lapointe<br>Hopital General Juif - Sir Mortimer B. Davis<br>Main Pharmacy 3755 Chemin de la Cote Ste-<br>Catherine Suite C-005 Montreal, QC H3T 1E2<br>Canada        | The Jewish General Hospital<br>Adele Cascini (Unit Coordinator)<br>Clinical Research Unit<br>Jewish General Hospital<br>3755 Cote St Catherine Road, Room: E: 872<br>Montreal, Quebec H3T 1E2         |
| 056             | Bruno Gagnon<br>Centre Universita de Santa McGill<br>McGill University Health Centre Montreal General<br>Hospital 1650 Cedar Avenue, C1 200 Montreal,<br>Quebec H3G 1A4 Canada | The Jewish General Hospital<br>Adele Cascini (Unit Coordinator)<br>Clinical Research Unit<br>Jewish General Hospital<br>3755 Cote St Catherine Road, Room: E: 872<br>Montreal, Quebec H3T 1E2         |
| 057             | Standiford II Helm<br>Pacific Coast Pain Management Center<br>24902 Moulton Parkway Suite 200 Laguna Hills,<br>CA 92637                                                        | Schulman Associates IRB<br>4290 Glendale Milford Road •<br>Cincinnati, Ohio 45242                                                                                                                     |
| 059             | Paul Daeninck<br>St. Boniface General Hospital<br>675 McDermot Avenue ON3114 Winnipeg, MB<br>R3E 0V9 Canada                                                                    | University of Manitoba<br>Bannatyne Campus Research Ethics Board, P128-<br>770 Bannatyne Avenue, Winnipeg MB R3E CW3                                                                                  |
| 062             | Johan Menten<br>UZ Leuven<br>Apotheek Herestraat 49 Leuven B-3000 Belgium                                                                                                      | Ethics Committee<br>UZ Gasthuisberg E330, Herestraat 49, 3000 Leuven,                                                                                                                                 |
| 065             | Guillemette Laval<br>CH MICHALLON CHU GRENOBLE<br>BP 217 High Ground Floor Grenoble Cedex 38043<br>France                                                                      | Comité de Protection des Personnes - Sud Est V<br>"C.H.U de Grenoble<br>Comité de Protection des Personnes<br>Service de Médecine Légale, R.C Haut - Hall<br>Vercors, BP 217, 38043 Grenoble Cedex 9" |

**Protocols 3200K1-4000-WW (B2541005) & 3200K1-4001-WW (B2541006)**

**List of Investigators Sites and their Corresponding IRBs**

| <b>Site No.</b> | <b>Site Address</b>                                                                                                                                                                                                                     | <b>Address for IRB</b>                                                                                                                                                                                |
|-----------------|-----------------------------------------------------------------------------------------------------------------------------------------------------------------------------------------------------------------------------------------|-------------------------------------------------------------------------------------------------------------------------------------------------------------------------------------------------------|
| 067             | Ragis Aubry<br>Hopital Jean MINJOZ Unite de Soins Palliatifs<br>Bd Fleming 5th Floor - wing north Besancon 25030<br>France                                                                                                              | Comité de Protection des Personnes - Sud Est V<br>"C.H.U de Grenoble<br>Comité de Protection des Personnes<br>Service de Médecine Légale, R.C Haut - Hall<br>Vercors, BP 217, 38043 Grenoble Cedex 9" |
| 068             | Benoit Burucoa<br>CHU BORDEAUX Hopital Saint Andre<br>1 rue Jean Burget 2nd Floor Bordeaux 33075<br>France                                                                                                                              | Comité de Protection des Personnes - Sud Est V<br>"C.H.U de Grenoble<br>Comité de Protection des Personnes<br>Service de Médecine Légale, R.C Haut - Hall<br>Vercors, BP 217, 38043 Grenoble Cedex 9" |
| 069             | Josyane Chevalier-Michaud<br>HOPITAL SAINT-ELOI<br>80, avenue Augustin Fliche Ground Floor<br>Montpellier 34295 France                                                                                                                  | Comité de Protection des Personnes - Sud Est V<br>"C.H.U de Grenoble<br>Comité de Protection des Personnes<br>Service de Médecine Légale, R.C Haut - Hall<br>Vercors, BP 217, 38043 Grenoble Cedex 9" |
| 073             | Sophie Laurent<br>INSTITUT DE CANCEROLOGIE GUSTAVE<br>ROUSSY<br>Centre d'Évaluation et de traitement de la douleur<br>et de soins palliatifs 39 rue Camille Desmoulins<br>Ship DISSPO - 1rst Floor - Room 713 Villejuif<br>94804 France | Comité de Protection des Personnes - Sud Est V<br>"C.H.U de Grenoble<br>Comité de Protection des Personnes<br>Service de Médecine Légale, R.C Haut - Hall<br>Vercors, BP 217, 38043 Grenoble Cedex 9" |
| 075             | Beverley Hattersley<br>St Peter's Hospital<br>Pharmacy Dept. 88 Maplewood Avenue Hamilton,<br>ON L8M 1W9 Canada                                                                                                                         | Hamilton Health Sciences<br>293 Wellington St. N. Suite 102<br>Hamilton, ON L8L 8E7                                                                                                                   |
| 080             | Paul Perkins<br>Leckhampton Court Hospice<br>Pharmacy Department Cheltenham General<br>Hospital Sandford Road Cheltenham<br>Gloucestershire GL53 7AN                                                                                    | London – Central MREC<br>Level 7, Maternity<br>Northwick Park Hospital<br>Watford Road<br>Harrow, HA1 3UJ                                                                                             |
| 084             | Louis Roy<br>Hatel-Dieu de Quebec<br>C.H.U.Q Pavillion Hotel-Dieu de Quebec 6, rue Mc<br>Mahon, Room 0691 Quebec, Canada                                                                                                                | CHUQ Research Ethics Committee<br>Centre Hospitalier Universitaire de Quebec, 10 de<br>l'Espinay Street, Room AO-124, Quebec, G1L 3L5                                                                 |
| 085             | Ronald Schonwetter<br>Lifepath Hospice<br>ATTN; PHARMACY HPC Pharmacy 111 Kelsey<br>Lane, Suite F Tampa, FL 33619                                                                                                                       | Schulman Associates IRB<br>4290 Glendale Milford Road •<br>Cincinnati, Ohio 45242                                                                                                                     |
| 088             | Gary Garner<br>Rocky Mountain Clinical<br>1429 South 550 East Orem, UT 84097                                                                                                                                                            | Schulman Associates IRB<br>4290 Glendale Milford Road •<br>Cincinnati, Ohio 45242                                                                                                                     |



**Protocols 3200K1-4000-WW (B2541005) & 3200K1-4001-WW (B2541006)**

**List of Investigators Sites and their Corresponding IRBs**

| <b>Site No.</b> | <b>Site Address</b>                                                                                                                                                               | <b>Address for IRB</b>                                                                                                                                          |
|-----------------|-----------------------------------------------------------------------------------------------------------------------------------------------------------------------------------|-----------------------------------------------------------------------------------------------------------------------------------------------------------------|
| 091             | James Cleary<br>Rebecca Marnocha c/o Susan Johnston University of Wisconsin Hospital and Clinics Pharmaceutical Research Center 600 Highland Avenue E5/125-1530 Madison, WI 53792 | Western Institutional Review Board<br>3535 SEVENTH AVE SW • OLYMPIA, WA 98502-5010                                                                              |
| 093             | Michael Harris<br>Aspen Clinical Research, LLC 1215 South 1680 West Orem, UT 84058                                                                                                | Schulman Associates IRB<br>4290 Glendale Milford Road • Cincinnati, Ohio 45242                                                                                  |
| 103             | Walter Forman<br>Lovelace Scientific Resources<br>2441 Ridgecrest Drive SE Albuquerque, NM 87108                                                                                  | Schulman Associates IRB<br>4290 Glendale Milford Road • Cincinnati, Ohio 45242                                                                                  |
| 111             | Sandra Serrano<br>Hospital AC Camargo<br>Rua Professor Antonio Prudente 211 1a sub solo Sao Paulo SP 01509-900                                                                    | Comitê de ética em Pesquisa em seres Humanos da Fundação Antônio Prudente<br>Hospital do Câncer – A.C. Camargo/ SP, Liberdade, São Paulo, SP 01509-900, BRAZIL  |
| 117             | Deborah Thorpe<br>Huntsman Cancer Hospital, Investigational Pharmacy Services Attn: Melissa Johnson 1950 Circle of Hope Room 2110 Salt Lake City, UT 84112                        | University of Utah Health Sciences Center<br>Institutional Review Board<br>Research Administration Building<br>75 South 2000 East<br>Salt Lake City, Utah 84112 |
| 120             | Sharon Watanabe<br>Cross Cancer Institute Pharmacy Department Main Floor, Pharmacy 11560 University Avenue NW Edmonton, Alberta, Canada T6G 1Z2                                   | Alberta Cancer Research Ethics Committee<br>308 Campus Tower, University of Alberta,<br>8625-112 Street, Edmonton AB T6G 1K8                                    |
| 125             | Nora Godinez<br>Eleccion Salud Dr. Jose Maria Vertiz #1097, Col. Vertiz Narvarte Delegacion Benito Juarez C.P. 03600 Distrito Federal, Mexico                                     | Comité Bioético para la Investigación Clínica S. C. Puebla # 422 Despacho 4, Colonia Roma Sur. C.P. 06700.                                                      |
| 1021            | Victor Chang<br>Dept. Of VA Affairs NJ Healthcare System 385 Tremont Ave. Hem/Onc (111), Rm 9-133 East Orange East Orange, NJ 07018                                               | VA New Jersey Healthcare System<br>385 Tremont Avenue, East Orange, NJ 07018                                                                                    |
| 1415            | Mark Marilley<br>701 Doctors Drive Suite N Kinston NC 28501                                                                                                                       | Schulman Associates IRB<br>4290 Glendale Milford Road • Cincinnati, Ohio 45242                                                                                  |
